# Supplementary material for: Genomic analysis of two phlebotomine sand fly vectors of Leishmania from the New and Old World
Source: PubMed Central journal article supplement (PMC10138862; doi:10.1371/journal.pntd.0010862), 2023-04-12
Supplement: pntd.0010862.s014.pdf [file pntd.0010862.s014.pdf]

| Peptidase group | Fam.    | PFAM                                    | Short Description                                 | Lu. lon | Ph. pap | Aed. aeg. | Anp. gam | Cul. qui | Dro mel | Dro pse | Glo mor |
|-----------------|---------|-----------------------------------------|---------------------------------------------------|---------|---------|-----------|----------|----------|---------|---------|---------|
| Aspartic        | A01     | PF00026                                 | Eukaryotic aspartyl protease                      | 4       | 2       | 1         | 1        | 1        | 13      | 13      | 3       |
|                 | A22     | PF01080                                 | Presenilin                                        | 1       | 1       | 3         | 3        | 4        | 3       | 3       | 3       |
|                 | A25     | PF03418                                 | Germination protease                              | 1       | 0       | 0         | 0        | 0        | 0       | 0       | 0       |
|                 | A28     | PF09668                                 | Aspartate protease                                | 0       | 1       | 1         | 1        | 0        | 1       | 1       | 0       |
|                 | A33     | -                                       | skin SASPase                                      | 0       | 1       | 0         | 0        | 0        | 0       | 0       | 0       |
| Cysteine        | C01     | PF00112                                 | Papain family cysteine protease                   | 5       | 8       | 15        | 13       | 19       | 15      | 12      | 10      |
|                 | C02     | PF00648                                 | Calpain family cysteine protease                  | 5       | 4       | 9         | 20       | 7        | 4       | 3       | 3       |
|                 | C12     | PF01088                                 | Ubiquitin carboxyl-terminal hydrolase, family 1   | 2       | 3       | 3         | 3        | 3        | 4       | 4       | 4       |
|                 | C13     | PF01650                                 | Peptidase C13 family                              | 1       | 1       | 1         | 1        | 1        | 1       | 1       | 1       |
|                 | C14     | PF00656                                 | Caspase domain                                    | 2       | 5       | 9         | 16       | 13       | 7       | 7       | 6       |
|                 | C15     | PF01470                                 | Pyroglutamyl peptidase                            | 0       | 1       | 1         | 1        | 1        | 1       | 1       | 1       |
|                 | C19     | PF00443                                 | Ubiquitin carboxyl-terminal hydrolase             | 18      | 17      | 21        | 39       | 29       | 23      | 18      | 24      |
|                 | C26     | PF07722                                 | Peptidase C26                                     | 2       | 1       | 4         | 5        | 4        | 8       | 6       | 7       |
|                 | C44     | PF00310                                 | Glutamine amidotransferases class-II              | 3       | 1       | 5         | 4        | 5        | 7       | 6       | 7       |
|                 | C46     | PF01079                                 | Hint module                                       | 1       | 0       | 1         | 1        | 1        | 1       | 1       | 1       |
|                 | C48     | PF02902                                 | Ulp1 protease family, C-terminal catalytic domain | 3       | 3       | 3         | 4        | 3        | 7       | 5       | 9       |
|                 | C54     | PF03416                                 | Peptidase family C54                              | 2       | 3       | 2         | 2        | 2        | 2       | 2       | 2       |
|                 | C56     | PF01965                                 | DJ-1/Pfpl family                                  | 2       | 1       | 1         | 2        | 1        | 2       | 1       | 5       |
|                 | C64/C85 | PF02338                                 | OTU-like cysteine protease                        | 5       | 3       | 4         | 5        | 4        | 7       | 6       | 4       |
|                 | C65     | PF10275                                 | Peptidase C65 Otubain                             | 1       | 0       | 1         | 1        | 1        | 2       | 1       | 1       |
|                 | C67     | -                                       | CylD peptidase*                                   | 1       | 1       | 1         | 1        | 1        | 0       | 1       | 1       |
|                 | C78     | PF07910                                 | Peptidase family C78                              | 3       | 2       | 2         | 2        | 2        | 2       | 2       | 2       |
|                 | C86     | PF02099                                 | Josephin                                          | 1       | 1       | 0         | 1        | 1        | 1       | 2       | 1       |
|                 | C95     | -                                       | lysosomal 66.3 kDa protein                        | 1       | 1       | 0         | 0        | 0        | 0       | 0       | 0       |
|                 | C97     | PF05903                                 | PPPDE putative peptidase domain                   | 2       | 2       | 2         | 1        | 2        | 2       | 1       | 1       |
| Metallo         | M01     | PF01433                                 | Peptidase family M1                               | 17      | 22      | 27        | 39       | 23       | 23      | 24      | 14      |
|                 | M02     | PF01401                                 | Angiotensin-converting enzyme                     | 5       | 5       | 8         | 11       | 9        | 6       | 7       | 7       |
|                 | M03     | PF01432                                 | Peptidase family M3                               | 2       | 2       | 2         | 2        | 2        | 2       | 2       | 2       |
|                 | M08     | PF01457                                 | Leishmanolysin                                    | 1       | 1       | 1         | 1        | 1        | 1       | 1       | 1       |
|                 | M10     | PF00413                                 | Matrixin                                          | 3       | 3       | 8         | 4        | 9        | 3       | 2       | 3       |
|                 | M12B    | PF01421                                 | Reprolysin (M12B) family zinc metalloprotease     | 5       | 4       | 7         | 13       | 11       | 14      | 7       | 11      |
|                 | M13     | PF05649                                 | Peptidase family M13                              | 6       | 5       | 9         | 9        | 9        | 30      | 27      | 25      |
|                 | M14     | PF00246                                 | Zinc carboxypeptidase                             | 20      | 26      | 24        | 38       | 30       | 32      | 28      | 28      |
|                 | M16     | PF00675                                 | Insulinase (Peptidase family M16)                 | 5       | 4       | 10        | 13       | 12       | 12      | 16      | 15      |
|                 | M17     | PF00883                                 | Cytosol aminopeptidase family, catalytic domain   | 6       | 6       | 5         | 5        | 6        | 9       | 13      | 11      |
|                 | M19     | PF01244                                 | Membrane dipeptidase (Peptidase family M19)       | 5       | 6       | 7         | 6        | 4        | 6       | 4       | 4       |
|                 | M20     | PF01546                                 | Peptidase family M20/M25/M40                      | 6       | 3       | 1         | 2        | 0        | 7       | 0       | 4       |
|                 | M22     | PF00814                                 | Glycoprotease family                              | 2       | 1       | 2         | 2        | 2        | 2       | 4       | 4       |
|                 | M23     | PF01551                                 | Peptidase family M23                              | 0       | 0       | 0         | 1        | 0        | 0       | 0       | 0       |
|                 | M24     | PF00557                                 | Metallopeptidase family M24                       | 8       | 7       | 11        | 16       | 8        | 11      | 6       | 12      |
|                 | M28     | PF04389                                 | Peptidase family M28                              | 5       | 6       | 3         | 13       | 5        | 15      | 9       | 9       |
|                 | M38     | PF01979                                 | Amidohydrolase family                             | 4       | 4       | 0         | 1        | 1        | 4       | 1       | 6       |
|                 | M41     | PF01434                                 | Peptidase family M41                              | 3       | 1       | 3         | 3        | 3        | 4       | 3       | 4       |
|                 | M48     | PF01435                                 | Peptidase family M48                              | 1       | 1       | 1         | 1        | 1        | 4       | 4       | 1       |
|                 | M49     | PF03571                                 | Peptidase family M49                              | 1       | 0       | 0         | 1        | 1        | 1       | 1       | 1       |
| M67             | PF01398 | JAB1/Mov34/MPN/PAD-1 ubiquitin protease | 5                                                 | 5       | 5       | 7         | 4        | 8        | 4       | 10      |         |

|           |         |             |                                                               |     |     |     |     |     |     |     |     |   |
|-----------|---------|-------------|---------------------------------------------------------------|-----|-----|-----|-----|-----|-----|-----|-----|---|
|           | M76     | PF09768     | Peptidase M76 family                                          | 1   | 1   | 1   | 1   | 1   | 1   | 1   | 1   | 1 |
|           | M79     | PF02517     | CAAX protease self-immunity                                   | 1   | 1   | 1   | 1   | 1   | 1   | 1   | 1   | 1 |
|           | M87     | PF08434     | Chloride channel accessory protein                            | 1   | 1   | 0   | 0   | 0   | 0   | 0   | 0   | 0 |
| Serine    | S01     | PF00089     | Trypsin                                                       | 112 | 126 | 370 | 560 | 428 | 306 | 215 | 221 |   |
|           | S08     | PF00082     | Subtilase family                                              | 6   | 4   | 6   | 5   | 5   | 6   | 5   | 5   |   |
|           | S09     | PF00326     | Prolyl oligopeptidase family                                  | 7   | 6   | 10  | 18  | 13  | 45  | 11  | 52  |   |
|           | S10     | PF00450     | Serine carboxypeptidase                                       | 5   | 3   | 5   | 4   | 5   | 5   | 6   | 4   |   |
|           | S14     | PF00574     | Clp protease                                                  | 1   | 1   | 1   | 2   | 1   | 1   | 1   | 3   |   |
|           | S16     | PF05362     | Lon protease (S16) C-terminal proteolytic domain              | 1   | 0   | 1   | 1   | 1   | 1   | 1   | 3   |   |
|           | S24     | PF00717     | Peptidase S24                                                 | 2   | 1   | 0   | 0   | 0   | 0   | 0   | 0   |   |
|           | S28     | PF05577     | Serine carboxypeptidase S28                                   | 7   | 5   | 8   | 10  | 9   | 6   | 7   | 2   |   |
|           | S33     | PF12697     | Alpha/beta hydrolase family                                   | 24  | 17  | 11  | 24  | 11  | 25  | 9   | 13  |   |
|           | S54     | PF01694     | Rhomboid family                                               | 4   | 4   | 3   | 5   | 3   | 9   | 6   | 7   |   |
|           | S59     | PF04096     | Nucleoporin autopeptidase                                     | 1   | 1   | 1   | 1   | 1   | 1   | 1   | 1   |   |
|           | S60     | PF00405     | Transferrin                                                   | 4   | 3   | 6   | 7   | 9   | 5   | 6   | 5   |   |
|           | S63     | -           | EGF-like module containing mucin-like hormone receptor-like 2 | 1   | 1   | 1   | 1   | 1   | 4   | 1   | 1   |   |
|           | S72     | PF05454     | Dystroglycan (Dystrophin-associated glycoprotein 1)           | 1   | 1   | 2   | 2   | 2   | 2   | 2   | 2   |   |
| S81       | PF05497 | Destabilase | 1                                                             | 1   | 2   | 2   | 2   | 7   | 3   | 1   |     |   |
| Threonine | T01     | PF00227     | Proteasome subunit                                            | 12  | 13  | 15  | 21  | 18  | 29  | 37  | 21  |   |
|           | T02     | PF01112     | Asparaginase                                                  | 3   | 4   | 2   | 3   | 5   | 5   | 4   | 6   |   |
|           | T03     | PF01019     | Gamma-glutamyltranspeptidase                                  | 2   | 3   | 6   | 3   | 5   | 4   | 4   | 6   |   |
|           | T06     | -           | polycystin-1                                                  | 1   | 0   | 0   | 0   | 0   | 0   | 0   | 0   |   |
|           | Total*  |             |                                                               | 376 | 376 | 703 | 983 | 800 | 808 | 586 | 646 |   |
