# Supplementary material for: Genomic analysis of two phlebotomine sand fly vectors of Leishmania from the New and Old World
Source: PLoS Negl Trop Dis. 2023 Apr 12;17(4):e0010862. doi: 10.1371/journal.pntd.0010862 (PMC10138862; doi:10.1371/journal.pntd.0010862)
Supplement: S2 Data — Open with a text editor. (FASTA) [file pntd.0010862.s055.fasta]

>PPAI000370
LGPTRFPIVGTKWIYFWHYKLNQLHSVYKDLNRRYGRIVLEVGDGIPVVHLFAKQDIEKVLKYPSKYPFRPPSEIFVYHRKARADRYSSCGIVNEQGETWHKLRCGLTPNLTSPRILIGFLPILNEICDDFIELIKIKRNEDNIIVNFQELVNALGLEALCALLLGRRMGFLAENPSDQVKNLASAVKALFITQRDSFFGTGLWKYLPTKTWRDFVRSEDTIYE
>PPAI000607
VKDEVDTMIAAGHDTSALTLSFTLLMLAIHQDIQEKVLQEILNVNPIPDAEMTFEDAGKLSYLEMVIKVSQSHYYVGCTSFTRVIFRDHETMRLFPILPISGRISTEDIKFSNGVVPEGTNLLLLSYRLHRSEKFWGPKANEFYPEHFLPENVAQRHPYSYVPFGGGLRNCIGNKYAMLSMKTIISVFLKNFRVTADGVTMADVKPSMITTMQVKQTKSMRITRRKLSGSI
>PPAI000609
MTLGLLLASLKIHHSVVENKETPCNAAFLGPLCHVFVTHHEDVKVLLTSPDALDKTYHYRYLFNETNLLVVPGHVWKVHRKLLNPHFTSPVVHTFIPLFNIKIDILVRKIRENILSNEPDIRDTVHNCFLDMICATTFGVDLNLQEGKHTEFAEAIDNYAKMVARRFFNFYLQVNWIFRWTPVGRLYHKSLNVLHNMTKKVVKEHIKNRQNSPELTSADNSSSTLMHHVVNLLEDGLFTQENLYDTVEIMILAGFETAAVTMMNIFLMLAMHPDVQERCLEEILRVCGQDGDVTGQDIVQLHYVETVIKETLRLYPVAPTIGRKPSKDIQLRNRIIPKGVHIIIVSYLVHRDPKVWGEDSNDFKPDRFQPENFSKIPYYSYIPYSAGSRNCIGPKYAMLVMKIVLVKVLRKYFFYTARRLKMSDLKCAMYTTIKIIQINELRVKERLQ
>PPAI001287
MLQLYIALAVVAICIYFKWTLSYWTRKKVEAPPPLPIVGNMGEMIIQKKHYGEVYNEIYRSYPTAKYVGIYKMGTPAVLVRDLDLVRDVLVANFAHFHDNDFEINTTLDPLLANNPFTARGTEWKNIRNQVSPLFTTAKVRACFNIMKEVGDTLLEYLDSSPEINRSEGVDIKKVMTKFTTDVVASTVFGVKAHAFVDPNSEFVQMSREFFVPSFLGAIKGMIAFFAPKIATILRISFVTENLDRRLRNLIRQLMASREANDKNARKDFVQAFVELKKKDQENRITEDLIVGQAVTFITDGTETSATVMTYTLYELARNPEVQKKVQDEIDRVIEENGQMTDEGIMQLDLLDRCIHENLRLHSVVFNMTRICTKPFELPQQFPNEGQPVTISAGTPIIIPMSAIHM
>PPAI001837_1
MFQLLLLVAVVLLIKFIYNEGYKNENFFKDKGIKFIKPKFIVGNSDNLFTRKQTSAEFFVNIYNYYPNEKLVGLFGFRQPMLLVRDPELLKQLTVKEFDHFVNHRDIMPTEGEPLFAKSLILLRGEEWREMRATLSPAFTGSKMRLMFELVSECGKQMADFVMKETEAKGIQTYEMKDFFSRTGNDIIATCAFGIQVNSLKDRENVFFLKGRDMTNFMKFSTFIKFIIFMTIPKLLPLFGIKIISESVTGYFKKVILDSMDYREKNHIVRPDMINLLMEAKKGKLSHQATEYPDSEGFATVQECNIGKREPKKVLDDDDIVAQCFLFFFGGFDTVSTALSFLSYELAVNTEVQERLFQEVLETSRELGEKSLNYDTIQKMKYMDMVVSELLRMWPPIPLADRLCTKEFVFNYDNNSTYKFEKGDIIFTSIYGFHHDPEYFPNPSKFDPERFNEENRHEIIPGTYLPFGIGPRNCIGKLVELYFIIFLNLNLIYLII
>PPAI001835
MFELFLFVGVVFLVKYIIDRGYKNEDFFKDKGIKYIKPTFIFGNSSNLVLRKKPILEFFKDSCLAMPNEKLIGMFEFRTPFVLVRDPELVKQLAVKEFDHFSDHRTVIANDADLIFGKSLVALQSDEWRDMRATLSPAFTGSKMRLMFELVSECANQMVNFVTKETKAKGVQTYEMKDFFSRMANDIIATCAFGIQVNSLEHQDNEFYVKGKDMMNFTKPLRIIKFMIFMVFPQLLSFLKIKLVPDSLTGYFKSAIVQAMNYREKNKIIRPDMINLLMEAKKGNLSHQENEHDSAGFATVEESDIGKRIVRKVLSEEDILAQCFLFFFAGFETVSTALSFLCYELAVNSDIQERLFQEIFEISQELGQNSLNYDTIQKMKYMDMVVSETLRKWP
>PPAI002111
MAIGIVLTLILLFVTFLVSYIRVLVEWRRKVYITSVPYVKAKGRQQYDPPSQPVTKEFSQAPGPAPWPILGNLPLLAHHENPFQAFTELSHKYGDAYSLTLGTTRCFVVNSLELIQEVLSHNGKFFGGRPDFLRFHKLFGGDRNNCEY
>PPAI003223
MLQFYVILVILAIYLYFKWHLSFFVRRGIAGPKPLPFVGNLWDYVSYRKHFGQIYDQMYQSYPNANYVGFYKLNQPAVLVRDLDIVKDVVAGDFSSFHDNDIVLDPKLDPLFILDPFFSRGDQWKALRNLLSPTFSYAKVKAYFPLMEEVCKNLVEWIENGPESKSADGIETKSIGEMYTVDVVASCGFGVEGKSFTNIESPFRKLIGEIISPTASNIIKFFVTLFMPKIAPILGIPFLSKDHDAWVRSFVDEVIKRRIERGEKRQDFLQAFMDLQKKKENAAYAKDLLPAMAITFLTEGTETSSSLICFALYELSKNPDVVRRAQEEVDAVYEKYGKITEEGMIELEYLEQILYETMRLHSAVFSLNKIATKDYTFPSQFPESNQCLTIPKGTPVIIPVNAIHHDPAQYPDPYTFDPSHFSESGRKERHKYSFLAFGEGPRICLGQKFAMFQVKGAIAALLRNFNFSLNKKTHQPLIISKATFMLAAEGGIWV
>PPAI003749
TILIKFKKILSIRFVKPKKCKCLLVVEIFNFARELARRYNYRSFKIWGFGILNINVINCRDVETMMSSSKHSDKNFLYNFLHPFLGTGLLTANGKKWQHRRRILTPTFHFNILKEFLVIFHEECEKFIELLKMEVQKKNGSNLPPLTSHVTLNTVCETAMGVKLDTYKGSVEYKNSIRNIGELLLFRFLRPWLYNDKVYSLLGYRKKLDDELIPVHSFTKMIIDHRRENFLESLPKLDQNDNIYETKKKRYAMLDTLLSAEAEGLIDAEGIREEVDTFTFEGHDTTSAALTFIFLLLAHHPDVQEKVYEEIKAALEANNNEPLATNELNDLEYTSRVIKECLRIYPPVPFITRSVTEDMKIEDDTIPAGAIAHIHIFDLHRDPDQFPDPERFDPDRFTPENSEKRHPFAYVPFSAGPRNCIGQKFALLEIKVVLQHVLTNFKLSPVTTREEIEFVGDIILRAKKPVKVRFHLR
>PPAI003750
MLTLLLVILLITIFIEIYFRTRPVYVNIARKIDGPPVLFFLQAIKFLASLSLESTFSHLRDYAQTFQKTYRFYAFGRLSINVIRAKEVEIYLSANRHMDKGQFYKFFSAFLGEGLLISKGDKWAQRRKILTPAFHFNILQQFLRVFHEESAKLVTLLDYGIEKNGQDVVNLPPITSRFTLNTICETSMGVKLDSMEEPDEYRKNIYSIGKLLISRILKPWIYLDLPYKLLGYKREMDRPLIPIHSFTRKIIRQRRERFHEEGAVDFAPGDRENVYETKKRRYAMLDTLLAAEADGLIDAEGIREEVDTFMFEGHDTTSSALTFIFLLLAHHPEVQEKVFEEIKSLVEANPGQSLSMAQLSELSYTDRVIKECLRLYPPVPIISRETSEEFILFGCKIPVKTMSHIHIFDLHRDPDQFPDPESFDPDRFLPENIEKRHPFAYVPFSAGPRNCIGQKFALLEIKALLKHILLHFRLTPITKREDIVFIADLVLRSRDPVRVKFHRRR
>PPAI004126
MVAHKTLDRAYNLELLSYLSLIVAGSLIYALSGYLKLLLVALKLPGPPAVPFIGNILMVGDKNVMVNDAAKAFSLYGTLIRLWGCIVPAFVVLDPHDLQIILSSRKHTDKGFFYKLMHNFLGNGLITSSGDKWSVHRKLIQPSFHLNILEKFIGTFNDSSQCLLDKFKAAEGEINITDFVNNCVLDILNGELTFLNPECQKKCIEEIDTIFDGDTRAPTMKDLREMRYLEQCIKETLRLYPSVPLLARRL
>PPAI004258
MLQLYIILGIVAIYLYFKWHLSFFIRRGIAGPKPLPFVGNLWNYVSYKKHFGQIYDEMYLSYPKANYVGFFKMSQPAVLVRDLDIVKNVLAGDFSSFHENDFTVDPKLDPLAINNVFIAAGDRWKMIRSQVSPLFTYPKIKACFPIIDVVRQSLVKYIESGPESTNPDGIETKSLGERFTTDVVASVAFGVEGMAFTDPNSDFKRMATTSLFSVSFISKDLDTWLRSIINQIIKRREETGEIRQDFLQAFIEMRKKDTQNILDENLIVGQSLTFITDGIETSSTLISFALYELAQHPEITRLVQEEIDVVYERHGGRMTEEGVMQLEYLEQVLFETLRLHSAVFSLAKVATKDYTFPSQFPGSNQCLAIPKGTTVIIPVNAIHHDPAHYPNPYIFDPSRFAENERKLRHRYAYLGFGEGPRICLGQKFGLYQTKCALSAILRHFNLTLSPKTIVPPPVSKKSFLLACEEGIWVKFKKRNT
>PPAI004304
FRLFPFIGQYKISDIARISYILHRDYGRIVRFSGLVGRPDLLFVYDADEIEKCYRHEGPTPFRPSMPCLVKYKSIVRKDFFGDLPGVVGVHGEPWREFRSRVQKPVLQLSTVKRYVTPLEEVTKDFLERCEQLLDDKSELPHDFDNEIHKWSLECKFNGRLSIGRVALDTRLGCLEPNLAPDSEPQLIINAAKHALRNVAILELKMPFWRYFPTPLWTKYVNNMNFFVEICMKYIQNATERMKSGGGGSVMEEPSLLERVLKAENNEKLACIMALDLILVGIDTISMAVCSILYQIATRPVEQEKLHEEIRRVFPDPSEPITYQHLDKLIYLKAFIKEVFRVYSTVIGNGRTLQEDAVICGYRIPRGVQMVFPTIVTGNMEEYVSDSNAFRPDRWLKANQGGFEGKLHPFASLPYGYGARMCLGRRFADLEMQILLAKLLRSYKLEYHHKPLKYAVTFMYAPDGELKFKMTKRNS
>PPAI004596
CNVPGPNPSFLVGNLGSVIFQKQHIGLLANKWYKKFRTLPYVGYYKVFKPAIMVNDTELVKNILINDFGSFYSNDISGSDDPQDIGSGNPFTQQDEQKWKTGRAAMASLFSASKVASKYSAENVTACLFSVEANCFDDPNSKFRKIGRKVFQASFWSGIRFTLLFYFPYIVELFAISIVADEVVDWIEKLVKDITEIRQNKAVENLDMFQVLLNSQKKYKLSMKQLTGHTLGSFVDGYETSSTSMSFAMWHLARNPDIQERLYEDISEVLQKHGNEFSYEAINEMEYLNMVMQETMRLNTIILSMHRKCRKPYTLPQLPGQEKPFVIQPGTPVLIPVYAIHQ
>PPAI004991
MIALGIFLVVLAIYLLKIDFFQRCMRFRKIIDFSFKLPGPPITELTRKAHKEKVLPWLLECRQKYGSRFLIWFGKDLIFFLTHPEDIKFVLSSQEIITKSGNYKVIKPWLGEGLLTSTGTKWQKNRKLLTPAFHFNILKQFQTVMDDCSEILIKKFSAVANEEPVDIYPYITLYALDVICETAMGIKKNAQENSESEYVRAVKKICEITHRRSFSMILRIPFFWNLSSYRKVQDDTLKILHDETRRVIQLRRKALENLNINTSEILNEASSMLGMKKRLAFLDMLLIAQREGKDLTDEHIREEVDTFMFEGHDTTSSAIAFTIYLLSHHPEEQEIAYQEVKDYEGRELETMKYLEAVIKESLRLYPSVPFYSRMITQEKITMGDLEIPSGVTLSVQPYILHRDPEIFPKPDVFNPERFLNAENMHPYAYVPFSAGPRNCIGQKFAMLEMKKTLAKVLHHFEFLPADEKPILLAELILKSNNGVRVRLKKRN
>PPAI005165
MRDPKMNRRGIFFVEGPFWKDQRRFTLRHLRDYGFGRRFAELEIEVRDEICLFLDILRNGPKYPHEHKIMKNGYVLVPDIFFASMSNAFLKILSGEKFPRSEQGILYETGSAGMQFQKAGDDYGKLLSVVPWIRHIFPEKSDYVNLRDGNEGLYKFIKLIVDKHVETFDDSHERNFIDLYIREMKAQQEEGIKNPVFHYEQLILICVDFFFPALTAVPVTIGFLIQQILTKMQKEIDDVVGKGRLPELDDRINLPYVEATIREIMRLETLVPSAIPHKAVVDTKLLGYDVPEGTFVVPGLYAFHMDPKLWGDPEVFRPERFIGDDGKLSLKLDKSLPFGAGKRLCAGETFARNTLFLMISALAQNFNIRQPPNDKLPDLSKTICGLITLPPQFWI
>PPAI005186
MLKARGICVSANQLRCFSAQAQKATASNFDDEAIERSWSTAKPYGTIPGPSILNLIRSFLPKGKFESQPFPEIHRQLRNEYGPIYKLTGTFGKRDIVVVNDPKDFEIVFRTEGTYPMRRGLDCLSYYRKEYRKAQYPVTYGLVTEQGESWWDLRHKVNGVMMKPQVTKGYTSAVDEVARDFVKKLHNMRDSNSETPANLLYFLNVWALESIAYITMNLRLGLLDKKPDENIDKLMVYLKEFFELLIELDLTPSIWKFYKTPKFNRFMEIMDFMHLTVGKLVAQGVENLKEQKLQNENREKSVLEKLYDIDKDVAVLMVLDSLTAGVDTTSSAVFTVLYNLSMNPEKQNILRSELLKILPEKDTPLTIENTTNMPYLRACIKEALRIMPITLGNVRSTGRNIVLKGYQIPKE
>PPAI005317
MRRPIFWIRDPELIRQIAVKDFDHFSDHPINIDESHEPLFGRNLLTLKGQRWRDMRSTLSPAFTGSKMRTMFQLVSECCSDTVNFLEKEIKEGKPLLTDLKDMFSRYTNDVIASCAFGLKVDSLKDKNNEFYLYGKEGSNFGKLRTIYFFMLMLFPKLYKVLGISLFSEKFSTFIRKLVWDTIRHRERENIVRPDMINLLIQARKGKLKHDDEVNEKEGYAVVQETH
>PPAI005511
MRLCEREGRDGSSGAGEAIALRFSTRLKVIPLRFCLWLKFIRLVSLGANGRIGGFSPVYQTGRRGLQFQAGGDDYGKLLSVIPWIRYFFPEESDYINLRDGNNGVYKFIKSIIDKHMESFDGSHERNFIDLYIQQMNEQKKEGTENPYFHYEQLILICVDFFFPALTGVPVTLALFFQRLLLQPEILTKMQAEIDEVVGRGRLPELDDRINLPYVEATVREIMRFETLVPSSIPHKALVDCKFMGYDIPEGAFVIPGLYALHTDTKVWGDPEVFRPERFIGEDGKLSLKLDKSLPFGAGKRLCAGETFARNTLFLMIAALAQNFNIRQPPSDRLPDLSKNYTGIIQLTPNYWLKFEAR
>PPAI006176
KYRACPFVGIYALRKPKIFITDPEFSRKILVSNFRQFHNNEASDMVSLKSDPIIGLNPFFMRDEMWKSTRQEITQGFSNIRVKAQFPIMESSCHKMTNYLRSHVKSQGSRITVSEITRRYTNENLMNCIFGLEANAFDNNKAGSFQMFKDYLAEFWRIDYFFMYSFIWPMFRSVYKYKILNTKLKNFFVDMLKHGMAFRSENPGNREDFLAFLMQMREKKDTSMDEMLAHALTFILDGFETSALVIDSILYELSRNSRVQKKLRQVIEDVRKSEGNLSFDTISDLPYLDQVMNETLRLHPPILFFLKQCNESMQVPFGNGNETKTFPKGITAMMSMYSLGRDPVFYENPNDFHPERFDDGAVKDYRDKGVFVPFGDGPRICIGMKFAIAQIKTAIVGIVRNFNLTLGADMKEPLGLQKTFFGIPAQDITVNFDPLPEE
>PPAI006266
MSNTVAPELPLGPNTWTASSVFYFLLAPAIILWIIYWKLSRRHLVELGEKLPGPPTLPIIGNLMSLLGSPHKTFENVMRMGKIYPGGVVRLWVGPKLTVFLFDPRDIELILSSHIYIDKSTEYSFFKPWLGNGLLISSGHKWRSHRRIIAPTFHLNVLKSFIDLFNENSRHVCNRLKDEVGKTFDCHDYMSEATVEILLETAMGVSKKTQESGYEYAMAVMKMCDILHLRIRKIWLRPNSIFNLTSHASRQEKLLSIIHGLTKRVITSKKEAFKNGTRGSLAETNIKTESTPSVKARSDNTTTVEGLSFGQSSGLKDDLDVEENDIGEKKRSAFLELLLESAENGASITEDEIREQVNTIMFEGHDTTAAASSFFLTLMGLHQNIQDKVIQELDEIFGDSDRPATFQDTLEMKYLERCLMETLRMYPPVPIIARQLKEDLKLSSGNYTIPAGATVVVATYKLHRMENLYPNPDVFDPDNFLPERQAKRHYYAFVPFSAGPRSCVGRKYAMLKLKILLSTILRNYRIHSNVDEKDFKLQADIILKREEGFPVRVVPRKKLTA
>PPAI006597
MIWLVLAISVVVLIAVVMKRKEEEKRKFFESKGIKANKPRFFLITMYKLIMKQMGIVDMVESLYYEYPEDDKVVGFWDGNTPIIMMKDPDVIKNFCVKEFEHFQDHRDFLSEKMDPLFGNSLFVLRDQKWRDMRATLSPAFTGSKMRLMCDLIVEIGVQMAEFLQKEAKEKGPQTYEMKQLFSRVSNDVIATCAFGINVDSLKHKSNDFYLTAKILSDFDSVGKMLRMTFYRFFPKFSNVIGLKFNPDKESNFFRSLVTDAMKYREQQNIIRPDMIHLLMEAKKGNLNHAKTEKDTAGFATVDESSAQWKKSNRNWSETEIVAQCFLFLLAGFETVSSALSFTAYEICVNPDVQERLYEEIKTVNENLQGQRINYETLQKMKYLDMVISESLRKYPPATVTDRECNKDITLDLFEGLSYEFKKKYSMWIPIYSLHRDPKYFPNPEKFDPERFSDENKSSINPNVYVPFGVGPRNCVGSRFALMELKTLIYYMTVELFTTRYRKNSNSS
>PPAI006597a
IIGLWDATKPTFMLKDPDLVKLIAVKEFDHFQDRRSVITEQMDELFGNSLLVLKGQKWRDMRSTLSPAFTGSKMRLMCELVVEICEQMVEFVKDDAKARGPQTYEMKDLFSRLTNDVIATCAFGVKVDSLKDSKNEFYESAQELSNFGTAKKSLKILFFRTVPWLMQLLKIKVNEEREATFLRTLITESMKIREEKHIVRPDMINLLMEARKGHLAHSNQTNVDKDDSAGFATVEESNVGLKSVKREWSDNEILAQCFLFLLAGFETTSSVLSFTAYEIAVNPEVQNKLYEEIKEISEELQGKKLSYDVLQKMKYMDMVVSESMRKWPPAPFVDRICNRKFKLDYDVGRSVDVDVDVSCWIPIVCFHHDPKYFPDPEKFDPERFSDENKSSINPNTYLPFGIGPRNCIGSRFALMELKSIIFYLILNFSLEVTEKTQVPVKLAKSLVSLTAEKGIHLQLRPRE
>PPAI006598
FFGIFEMRSPLFLIKDPELIKQMAVKDFDHFLNHRINLDETHDPLLGRSLLFLKGQRWKDMRSTLGPAFTSSKMRTMFQLISECSSATVDFLEKEVKDGKPLLTDMKDFFTRFTTDVIATCAFGIKIFGISLFEKEFHDFFRNLVWDTIHHRERENIYRPDMINLLIEARKGTLQNEEERQETLNEGFAVVQDTKIGEAIHERNLVEDDLTAQCLNFFLAGSDTTSSSLCFTAHELAVNPEVQKKLLLEVDATRESLGGKPLTYEVLQNMKYLDMVMSAGIITDRKCVKPYTIRTDEISCDVKIGETIFIPIVSIHHDPQYFPNPSRFDPERFSEENKHKINPFTYIPFGVGPRNCIGSRFALMETKAIIYYILTKFTFEVSEKTQIPLK
>PPAI006598a
MIYFIISSLVALIFSKWSVLIAVLGYFVYKWSTATYDTFKRRNLKFIPPVPLLGNFRHMVLQTKSFSDAISEMYNYFPTEMFRFYGIFEFRRPLFLVRDPELIKQIAVKDFDHFLDHRLNLDETHDPLFGRNLLSLKGQRWKDMRSTLSPAFTGSKMRTMFQLVSECSSATVDFLEKDVKNGKPILMEMKDLFTRFTNDVIATCAFGIKVDSFHEKNNQFYEFGKKASDFSGIRSLYFFMLLQFPTISKALGISLFTKEFSSFFRNLVWDTIHHRERENIYRPDMINLLIQARKGKLHHEEEGQESLSEGFAVVQETKIGEAIHQSKFVDDDLTAQCLIFFLAGFDTSSTCMCFTAHELAVNPEVQKKLLLEVDATRESLGGKPLTYEALQKMTYLDMVISESLRYWPPGVATDRKCVKPYRIKTDEISCDVKVGEAILIPIVSLHHDPKYFPNPSRFDPERFSEENKHKINPFAYLPFGVGPRNCIGSRFALMETKAIIYYILTKFTFEVSEKTQVPLKLAKAGFALKPQKGFWVDLKPRNL
>PPAI007097
MFLNLLFVTILGPTRFPIVGTKWIYFWHYKLNQLHSVYKDLNRRYGRIVLEVGDGIPVVHLFAKQDIEKVLKYPSKYPFRPPSEIFVYHRKARADRYSSCGIVNEQGETWHKLRCGLTPNLTSPRILIGFLPILNEICDDFIELIKIKRNEDNIIVNFQELVNALGLEALCALLLGRRMGFLAENPSDQVKNLASAVKALFITQRDSFFGTGLWKYLPTKTWRDFVRSEDTIYETISSIVDKALDDEKREYNDLDVRNIFYSILSTPELDVKDKKSGIIDLMTAGVETLAHTLAF
>PPAI007189
MLVVLLVLVVGTIFLFFRNIYSYWKRKGFPYIKPSIPFGNIRETAMRKMSLGTCLHELYKKSTDPFVGIYLFFRPALLIRDANLAKYILTSDFEHFYDRGVHCDEENDPLSATMFALTGQSWKKMRSALSPTFTSGKLKNMFPTIMETGIELQKYVEPMAEAGKSIELFELSARYAVDIIGSVFFGISVDTIHNPENKFRQIGRIAQGENISVAIRSVGLLLVPKLLQIARVGILPSFVAKFVINLVKDTIEHREKNSVTRNDFMQLLLQLRNTGKVSANDETWETKIKDGEESKGRPLAKKLYPFPQVTSRLDVERENA
>PPAI007385
IFYLTLCFRMVGFFDFRDPVVLIFDPEIVKQLAVKEFDNFSDHKAVFKENSDNLFGNSLFALQGQKWKDMRATLSPAFTGSKMRLMCDLIVEICEQMVDFLKSEVTTKGLQTYETKELFSRLATDVIGTCAFGIKVNSLKEKDNNFYVTAKKVFSFNNFGTQIKFVFYRLCPWLMELLKIPLFDETGRSFMKNLVLNTMKTREEKKIVRPDMIHLLMEAQKGNLTHVTNEKDSAGFATVEESEIGLSGARRTWSEDEIVAQCFLFFLAGFDTVSTVISFIIYEIMLNTDVQEKIFEEISDMNRKLGGKAVKYESLQQLKYLDMVISETLRKWPPGPVVDRICNKDFTLKYDGDREYTFHKGEVFWIPIVNFHHNPEYYSNPEKFDPERFSDENKGSINTSAYVPFGVGPRNCIGSRFALMELKSIMYYLILNFHIEPTEKTQIPLRLAKSIFGLQTEKGIHVQFRPRNH
>PPAI007385ag
MWFLILCVVIGWLLYKYGLRNEHFFRDRGVKYHKPLPFFGNSFRFFIQQENLISHVQKLCKDFREEK*DVVNKLSCKVLYFMIFFCRIFGIFDVMKPTLVIQDPELVKYLAIKEFDHFTDHRQLITPDIDPLFSHSLFSLKGQKWREMRATLSPAFTGSKMRLMCGLIVEICEQMVDFLKTEAQTKGPQAHEVKELFSRLATDIIGTCAFGIKVDSLKEEKNKFYVVASEMFNTTSVLLTIKFIAARACPKLMKLFGVTIFDEQYRHFLNGLVLNNMKTRMEKSIVRPDMINLLIEAQKGTLENTSTDQDSAGFATVEESQMGTVAKKTSWTEEEIVSQCFIFFLAGFDTSSTVLTFVAYEVARDPKVQEKLYQEAKAFYGELKGSPLKYETLQKMKYLDMVVSETLRLWPPAAAVDRICTKDFTMEYDQGKKYTFTKGEQIWIPVGGFHFNPKYFPEPEKFDPERFSDENKASINQSAYMPFGVGPRNCIGSRFALMEVKSLIFYLIVNFHFDLSNKTEVPLVMKGSFVGLKARSGVWIKFRPRE
>PPAI007387
MIWLVLAIAIVALIVIMMMRKEEERRKYFESRGIKADKPRFFIVILYKFFTGQMGMVELLQGMYNEYPEEDKVVGFWDGDTPIILMKDPDVVKLFAVKEFEHFQDRRNFISEEMDPFFGNSLFLLRDQKWRDMRATLSPAFTGSKMRLMCDLIVEIGVQMAEFLQKEAKEKGPQTYEMKDLFSRLSNDVIATCAFGINVDSLKHKSNDFYLTAKALSDFNSVGKLLRMTFSQYFPKISNALGLKFNPDKDTNFFRSLVTDAMKYREQQNIVRPDMIHLLMEANKGKLNHTKTEKYTAGFATVDESSAHWKKSDRTWSEKEIVAQCFLFLLAGFESVSASLSFTAYEICANPEVQEKLHEEIKTVNEDLQGDRINYETLNKMKYLDMVISESLRKYPPAVVAERECNKDITLDLFEGLPYEFKKKHGLWIPIYAFHWDSKYFPNPEKFDPDRFSDENKSSINPNTYIPFGVGPRNCVGSRFALMELKTLIYYMVLNFSLEVTEETQIPLQLGKTFGTLISEKGIHIRLCPRN
>PPAI007386aa
QTYEMKDLFSRVSNDVIATCAFGINVDSLKHKSNDFYLAAKVLSDFSSVGKVLGMVFSQNFPKISNAIGLKFNPDKESNFFRSLVTDAMKYREQQNIIRPDMIHLLMEAKKGKLNHAKTEKDTAGFATVNESVEWKKSDRTWSENEIVAQCFLFLLAGFDTVSTSLSFTAYEICANSEVQEKLHEEIKTVNEDLQGDRINYETLNKMKYLDMVISESLRKYPPAVVAERECNKDITLDLFEGLPYEFKKKHGLWIPIYSLHRDPKYFPNPEKFDPERFSDENKSSINPNAYIPFGVGPRNCVGSRFALMELKTLIYYLVLNFSLEVTEQTQIPLQLGKTFGTLTSEKGIHIRLHPRN
>PPAI007540
DRGIVNLPPLTSRHTLDTICETAMGVKLDSLEEPDAYRNNIYSIGRLLVDRSLQPWLANDFIFKVLGYKEKLDKCLTPIHSFTRKIIQQRRYEFHEDIVPVASTSEDIYGGKKQRYAMLDTLLTAERNNLIDVEGIREEVDTFTFEGHDTTASGITMILFCLAQNPDIQERVYEEIKSIRQEKNGAPLEIADYSNLVYTDRVIKECLRLYPPVPFISRELTETQEVNGYPVPTGTIVALHIFDLHRDPQYFPDPERFDPDRFLPEQVEKRHPFAYLPFSAGPRNCIGQKFALLEIKTVIESILINFHLSPITRREDLVFVTDLVLRTADPIKIKFTRRT
>PPAI007549aaa
EKRRLAFLDLMIETARGGASNFSDEDIKQQVDTIMFEGHDTTAAGSSFVLCLMGSHQDIQEKVYKELKNIFGDSDRPCTFADTLEMKYLERVIMESLRLYPPVPLIARKIQQDVKLNTDNYVLPAGCTVVIGTFKLHRRGDIYPNPDVFNPDNFLPEHTQNRHYYSFIPFSAGPRSCVGRKYAMLKLKVLLSTILRNYKINSDLTEKDFKLQADIILKRADGFRISIEPRRKEKVI
>PPAI007563
MLSIILLGIIFAIIIYESYKYMFYRPPNFPPGPPRIPIFGSYLFLLLINRRDLHLAALTLSKWYKSKVIGMYLAAVPTVICHDADGVKEILNRQEFDGRADIYLARMRDPNHNLRGIFFTEGPFWKNQRRFTLRHLRDYGFGRRFTELEIEVRDEICSFLDILRNGPKYPHEH
>PPAI008274
EFYGKTPFIGVYLLRSPHILAIDPDFVKFVLVENFKQFNDNLISDMTTTKSEPYIGHSPFMLKNKEWKEIRTQWGPAFTSGKMKAMFPIIENTCLKMSNFLKHEVANQSKDGVHFRDVTARFTTEVVTDTIFGVEAGTFAQEKALLCDLGAKLLDCFENVVNFFIITSIFPFLKRFRCFWIVSKTVGRGFEELMKKGMQFRSQSNSQRSDFLSFIMDLGSRQNLSLTEMTSHALTVYLDGYETTSITIPLVLYQLAKNQQAQEKLRNEIREYELNGGINYEAIQEMEYLDQVVNETMRVHPPIIIINKLCTESVKYPVNGRQVEIPRGMTVHIPIFSIHRNENNFPNPEEFIPERFDKERGGSKVFKEKCSFLPFGNGPRICL
>PPAI009360
QATVDGKPLTNEDIREEVNTFMFAGHDTTTSGISFLLYNIALYPEVQEKIVEEIKYVLGMDPERFFTFGDLKNMTYLECVIKESLRLFTPVPMVARYFPEEVELKCMRIPAKSNVVINAFCMGKDPSLYPDPDTFNPERFLEDEIEGRNPYSYIPFSAGPRNCIGQKFAMAEMKTLVVRLLQKYRISVDPSYDKPILIATIVLRAKNGIVL
>PPAI009634
MDSITFGKAFEGMKIVELVSPFCSIFLLARNFSLIERYLVQESHDIAWQYPLPKLLHYDPEDFKTVFQSQGQYPIRRGFDTIVDYRSNVRKNFYQGVIGFVDQGKSWWDFRHKVNSVMMKPQITRKYVPAVDEVTQDFVKRLHSLRDQNMETPADFYAELNMWALESIGQITLDTRLGIFDNTTSKNMHSLMSDLKVFFDLTYQLNFKPSLWKLFPTPSYRKLIRSTDNMYSVIQEYINIGIQKMKENTDDAENEGVLKKLLEIDPKIATIMVMDSLFAGVDSNKLITSFSL
>PPAI009825
MIGLIGIATLITLLYYIWTRRDVYRLTWKLPGPFPFPFIGAGWLVLGKSHEEYLQMVEKMFQKYSSFHHFWLGPRLYLLVSDPKLIQTILFSQEALNRDDVYDFVSLLGDGGGLLTLKGQEWKNHRKNLNPCFSLKILQSYMPIFNEQAGIMMKNMSAKLNKGSFNFYEFMDACTLDMICQTTLGTEMNIQKGQNQDYLYACNNLFELITIRIFRPWFHSDFLYKFSHLHKTTEKLRKITSEFVEKVIKSKTSATEDAKERGMMKVERQVSEDELTSYKKPQIFIDQVMDMFNEGKLVTRDDLKAHVGTNIATGFETSALISSYCVLMLAMHPNIQQKVYEEIESIFGKNCREPVVEYEHFNRLEYLDRALKETLRLFPVVPYFARKVSKDFHLAGHKIPVGVRIMISMITVHHDKEIWGPDAEKFNPDNFLPEKIQTRHPYSYFPFGGGIRNCIGMKYSLMSMKTMIIHLLCNYRLNTELRMEDLRTKIDVTLKLINKHMVSIEVR
>PPAI009965
FVIPLIGNYQTTFGVSNEGLLKIVQYLTSSFKGPCRWWIGTTMYVIVKNPEDMQTVLNSPQCLSRAEVYEFLRSFGGEGLVALPESEWKVHRKLLNPTFSLKILQTYMPIFNKEVKVLVSRLKELTNKKDATDIYTYMDALTLDVVCQTTMGTEMHIQKNQNIEYLDAGNNLLSIITTRMFNPLLHWDWIFRLTPFYWVEKKSSDITFGFVDKILQKKKINYKPPETSKSDDDDDLPLKTPQIYIDQLMKLRMVEKKFNDRDVVSEANTIVATGFESTALVSSYCILMLAMFPEHQQRIYEEIKSIMPNKEDDVQYDDFGKYEFLERFAKETMRLFPSVPLIARTASAPFELGEYTIPAGTNIVCAISMMQRDKTVWGPNADKFDPDHFLPENLEKVHPYAYLPFSGGPRNCIGIKYAYMFLKTILIHLVSNFKFRTDLKMSEFRHRMDITFKLINKHMVYVEKRDA
>PPAI009966
MLGIALIITVFVLWFLHYLWRDWDLYRVAWKMPGPFMLPLIGNTYCTLGMSHEGILDYLRLLSHKYPSPMRFWLGPKLFILISRPEECQVVFNAQECLSRDDIYDYIKSFTGDGLVTLPAATWKDHRKFLNPCFSLKILQSYMPIFNNEVKTLIGRLGQKIGSGSFDMYDMMDACALDVVCQTTLGTQMNIQKNENMDYLDAANSLLAIMTTRIFNPFYHSDFIFKLSKWAKLEQKNSDITFGFVDDILQRKKAAYKKALPIEDKSALDENTSFKSPQLFIDQLLKLSMEGNYFNDTDVKNEANTIVATRKS
>PPAI009999
MGVEPMYIEHPWIYSIGLMLTPFVVGGLGLLAYYIYWKNSRLYIMGQKIPGPPIIPFFGNAHIVIGFSTHGNNVFNIFTKLSNMYGGGEVARIFIGNKLVVFLTNPNDVEIILNSNVHLQKSDEYRYFKPWLGDGLLISSGEKWRNHRKIIAPAFHQNVLKTFVNIFNSNSRAVIERLAKEEGKVFDVHEYMSEVTVDILLETAMGTERATQNHDGFEYAMAVMKMCDIIHRRTYRVDLRYDPLFYFTKTKRDQEKYLGTIHGLTSKVFRDKKRNFQKSLSEGHMPKPSFEEIIANTKNSETTNGSTASKLYKGLRDDLDEQDENDVGEKRRLAFLDLMIELSHVGPKLSDEEIKEEVDTIMFEGHDTTAAGSSFCLCLMAIHKDVQEKVYQEQKAIFGDSDRFATFADTVEMKYLERVILESLRLYPPVPIIARKVNEDVKIVTGGHVIPKGTTVVVGTYVVHRRPEIYPNPTVFNPDNFLPEKTQNRHYYSYIPFSAGPRSCVGKPEICNA
>PPAI010132
MWSDLDVKEVRSCLYVFIILLMVVLIQWLLKCYREIKLLPPGPWGIPVMGYLAFLGQEKHTQYMELAKKYGGVFSARLGTQLTVVVSDYKVIRDTFRKKEYTGRPDTPFIQTMDGFGIINSEGKLWRDQRRFLHDKLRQLGVTYMGKGKDVMEKRIMTEVNDYLSTLAASNGNSIDMSPVLAVAVSNVICNIMMSVRFSLDDPKFQRFTWLIEEGMRLFGEITTVDYIPTIQYLPGNLNAKNKIAKNRKEMFQFYREVIDEHKSTFDASNIRDLVDMYLAEIEKAKEEGRSSELFEGKDHQVIGDLFSAGMETIKTTLLWINVFMLRNPQVMRKVQEELDLVVGRSRLPRIEDLPSYHTPKVQFWKRCDDRASFHWLQLTHLQDVTLNGYVIPAGAHVVPLINSVHMDPTLWDNPEEFNPNRFINAEGKVQKPEYFMPFGVGRRMCLGDVLARMELFLFFSSLMHTFDLKLDGEPMPSLKGQVGVTITPKAFRVCLTPRPLAVPQVIVSDPVTGTLRNVGSY
>PPAI010187
MAGIVENILLNVYFLIFVAFVIIIYFYVKYAFSYWERNNVLYKKPIFPFGNFTPVFMSRQSFGEFLLEMYQSTTVDFIGLYAMVRPIFFVRNLELCRNILVKDFHFFHDRGVYVDETVDPLSGHLFSLSGEKWKQLRAKLTPTFTSGKLKAMFQTLVDCANSLEKKLKAEVDHNTEIEVRDLMARYTTNVIASVAFGIEVDSINEPNCSFRHYGKKAFAPTLKNAIRNALFLILPKIAKLIKLKTVESDYEKFIFSMVKQTIDHREKNNIQRKDFMQLLLQLRNTGNVDRGDEWNFTSTKDELKKLSINELAAQVHVFFLAGFETSSTLMSFFLYEMARNHDCQEKVQKEIDE
>PPAI010187a
MALFFDSGFWDIATILSFCSVALYFYIQHIYSYWDKRNVKFATPIFPFGNLKDAFLLKKSFADVFQELYNFTDEPILGLYTTNKPALMVKDTELLRLIMIKDFQYFHDRGVYMNENLDPLSGHLFSITGDKWRQLRAKLTPTFTSGKIKAMFQTFLNCGKSLETFLAKNANENTEVEMRDLLACYSTNIIASVAFGLETDTITEPEATFRIMGRKFFAPTLKNIFRLTCLFILPHIGRMFKIKSVDDDYENFIFSMVKDIMNYREKNNIQRKDFMQLLLQLKNTGKVDYGDTWDIQATNNIPGRDIIIEKGTRIFIPAHAIHHDPKYYQNPESFKPERFKTDASNNEQKGIIYMPFGDGPRACIGLRMGKLQSKLGIVLILSKFNIQLGDKLKNLEKIKFDLKSFTPSIEGGIKIPNILKCLMSLTQTVSYQKMLTRIFHSVMVPEIVFERAWRG
>PPAI010200
YLSIKSTVERSRCGQTRKLFCAMAIAECLTCSSFGVDTVNVKQYNEVPGPSAFELVKSSLPGGKYYKKDFADFLSSFRQEYGDISKIPGVFGKNDIILVYDPEDFKTVFQTQGQYPIRRGVDTIVHYRSKVRRDFYEGVIGFADQGKSWWDFRQKVNAVMMKPQITRKYVPSVDEVTQDFVKRLHSLRDKNMETPSDFYAELNMWALESIAQITMDTRLGIFDNTTNKNMHSLMSDLKVFFDLTYRLNFQLSFWKYFPTASYRKLTQSTDNMYKVIQHYVNIGIRKIKDNADDEENEGVLKKLLEIDPKVATIMVMDALFAGVDTTSTATFSVLYVLAKNPEKQDKLRQELMKILPEKTSPLTVENMSNMPYLRACIKEALRLYPVTFGNFRSTGQDLVLKGYHIPKDTDILMGNQITQMEDKYFDKPYEFKPERWIRPPNSKITCPVSATSHPFSYLPFGFGTRMCVGRRFAEMEIESLVSRL
>PPAI010394
MIVFLFVACVVLFCCIDIQKPKEFPPGPKWLPIVGNFPQIFCLRKSLKYHHLIWKHLSEEFGSVVGLRLGRDRLIVVSGCEAIREFYNRTEFDGRPNGFFYRVRSFDQRLGLVFTDGEPWEIQRRFCMKTLKQLGFGKFSMVKRIEKEAEEMIEHFWLKNQRDGAIFMHNAFDICVLNVLWSLMAGKRFDLEDERLTRLMKLIHESFRIIDMSGGILNQFPGIRHILPNLSGYRPLIETLRPLWTFLRETIDEIKILKPDHEPKSLIDAYAREIKSTQNPNSTFTEDQLLFLCLDMFQAGSETTSNTLGFSLIYMLHYPEVAKRVKEELRIVVGLNFLPKLEHRSQLKYTEAVLCEIMRCVNVAPLAIVHRATETVKLLGFTVPKDTLALVSLYSLHMDEKTWKNPKQFCPERFLDS
>PPAI011022
MNLILGKSVILSRMYQYLSYMSPITLLVYVLLITLILLYNKRRARLVKLIDKIPGPPGIPILGNTIEINVDHDELFTRILGMRTLWGRRQGFCRAWIGTQPYVFISKPSVVEPILGSPKHIDKSSDYNYLHPWLGTGLLTSSGVKWHSRRKVISFPFPWRNIFQCLFFMQILTPAFHFKILEDFIDVFSEQSSILASKLAVEVEKESFNIFPYVTLCTLDIVCAAISWTLFLIGSDPEIQERVIEEIDLVMGGDRERSPTMKELLDMKYLECCIKEALRLYPSVPLIARQIKEDVHIDSYTIPAGTTAMIVTYMLHRNPEIYYKPEQFNPDRFLPQNCQGRHPYAYIPFSAGPRNCIGQKFAILEEKSVISAVLRKFKIEAVDRREDLTLMGELILRPKDGLRVRITPRK
>PPAI000301
MFRVNVVHSLRKFCSFSKVNNGKCVLEFKDIPVAKGLPVIGTTLDIVGAGSAPKFHEYINERHKKLGSMFRERIGSLECLFISDPEVIREIFLHEGKYPRHPIPDAWKLYERKHRNKRGLLFMDGEDWLYHRKIMNTLLLNRDFSPFVDPIKNSVGRLMAKWEASEPIKPLENIESDLYRWSLETIINLTVGSAYTEIQPEIEESLEKLSRVLHRVFKTSAKLFLLPPQICEFLGTNGGTRALKMMLILLSKHPDVQENIRKEVVGRDSANADEIPILRATIRETLRLFPVAPFVGRVIGGKDTILGNYRIDQEVMGIVSLYTSSRDPRNFYNPNQFHPKRWMRSEGASEHKPQASLPFALGARSCIGQKIAMKQMCELLRQLLQHFHLKNYTGPVNPVLQLITVPDKKIEIGLRKIHL
>PPAI000242
MQIKFRKLDDDPGKDIGKITLNQVISNAFLFLLAGFETSSTTMKFCLLELAQNIEIQNRLRQEIRAVLERYDNQITYESLSEMKYLEQVINSLFKETLRKHPVGGVLTRTVRENYKIPKTDVVLEKGTQVFIPVLGIHHDPEIYPDPQKFDPERFSPEAIRARHPYAFLAFGEGPRNCIGMRFGMMQTKIGIICTLLNYNLSPCAKTKYPIEYVKSTGLLSPAGDCWLQVER
>PPAI000241
MSALDFLLFFVAVIFLGVSFVKRRYGYWKERGVPYIPATFPKGNLQNLGKTVHFFELAKKFYFEMKGKGKPLGGIFLTVRPVGLALDLDFVKTMLVKDFQYFHDRGFYVNERDDPLTGHLLAIEGERWKNLRSKLSPTFTSGKMKLMFPIMISTSDKLIMRLNEDLTKTNNIELGDYLSRFTIDIIGNCAFGLECNSLDNPDAEFLRMGKKAFDNSEGRAFKRLFITTFKGLSRLLRLQMTRKDISDFYTRIVKETVEYREKEDVKRDDFLNLLIQLKNKGMQLQWGYLKAHNSSLSELLLSYIYTFWFRNTNETLRLFPPVGTIHRVSNQDYRLPNGAIMPKGTFVVIPNMAYQYDEKFFPNAQHFDPDRFKEDARGDRHHFTFIPFGEGPRICIGMRFGLLVVKIALAQILSQYRFTKNEKTSTELEINSTAFVHTPKNDIWLNLTAIH
>PPAI000242a
MPCTVFFALGATVLLVWWYISFKFTYWARRGVIQMPPSFPFGNIREVGRTLHSAELMKSVYEKFRGSGQAFVGLYYFTRPVAMVTDLNLVRDILVRKFVHFSDRGVYFNEVDDPLSAHLFSLEGEKWRDLRRTVSSLFSPTRTRVFHNAIWEVSSRLAVCIGAKTSHNPTINVSDLSGRYVIDTIGQCVFGINPNTILDDTAPFRAISAKIFSMTPMQMLKHLFMQSFRNTARKFHMKLTKKDVEDFFLSLNCTQPEGNFTQQTSFTQLLQKLREEGKLSSNQVTAQAFIFFVAGFETSAITIAYCLHELAWNPLIQERLREEILELEQGDLSWDAINRMTLLSAVVNGKLETLRKYPPGGNFLRVAKEDFKVGNKIIERDTLVVIPLYGIHRDENFHSNPLIFNPDRPELAQHSCMFMPFGDGPRHCIGRRFALHQVKLVISALVSHYRFSPTPDASYSIELAKNTVLLKPQKPIFLNVERLSQR
>PPAI000766
MFLLEILSVLVSGIVCLYFYLIRNHNYWAKRGIPGPKAAFVVGNLPGIFTQKRNAVYDMEEIYNKWKTDANFVGFFNMMQPQILILKPELVKTVTVKNFQNFHDNDFADMFGKDSDPVFTKTIFMLKGAEWKENRAELAPAFTDNKMKSMFILIEEISERLLNYLDKGVKDKGSPLVLEARELSTKFSIDVIGNCIFRVNGGALGEENSQMMKMGEELMNPSGSFLLSFLLLQFFPVLKGIIKPQLVKKTVADYLRNLIREVNEKRRENPAEGGDFMSFMEHLRINRGTDPAQILGHVFTFFIDGYEMSSNVLAHALYQLAKNPEIQDKLRDELQSLESLGCIANPNSEQCEYLHRILLESLRINAPLPFVTKRCTKECKLSLRQGEEVLIETNTPVVIPIYCIQRDPQYYSQPETFDPDRFRNGNAKKFQNEGIFLPFGDGPRICMGMKFAMMQVKFGVATIIKNYRLTVDPKTLDPFRLNPKRFTTTPEGGYWLKFTPIDEK
>PPAI000921
MFGGIVVASLVLILVINFLVERWKLLKFTTRFPGPKPHFIFGNAGEFVELKKDPAGIFKKLISFHDIYGKRCVLWGFFNEVGISFIDPNDIETILSGTKTMHKSVEYDFLEPWLGEGLLVSFGQKWVTRRKIITPTFHFTILEQFVTSFDEQTNILVQKLKPHANKGDFNIYPYTTLSALDIICKTSMGAEIHAQEHPETPYVQSVK
>PPAI001399
MINAATAPIAVKQNHINLSAKGLPCSAMYLTPWRVELLKNSLVCQRRLVRNSRRRCMGENLAKSSLFIFFATFMHVFEMRLPDNEPEMPDLDGVDGITLSPKPYRVILSR
>PPAI001599
MEGFLLWIFTFLTLIAGSFGLLYAWSMKKFRFWKDRGICHNEPVFPYGNTKGVSRAIRFSDILTDLYYKYQGKEKFVGLYMFMKPIGMASDPDLIKQILVKDFHNFQNRGLYHNEKHDPLSGHLFTLEGEPWRILRTKLSPTFTSGKIKMMFNIMVEVTKELKRIVDEELKVNNDVDISDTMARFTMDIIGNCAFGIECNALKNPNEELMVFGKKFFNPGPRQIMRQIAFSVFPELSRKLGIRAIEEDVSSFFMGVITETVRYREQNGIVRSDFMDLMLRLKNSGKLDTDDNAEKSGLITLNELAAQCFVFFLAGFETSSTTISFSLYELALNPDIQERLRKEILQCLEETNGVLTYEAVMGMKYLEKVINETLRKYPAVEMLVRKAKNDYPIEDTPHTIPKDTLIFIPVYTVHHDPKIYPHPHKFNPERFNEENMRNRHPYTYLPFGEGPRNCIGMRFGLLQTRIGIITMLTNYRLTVCQKTPKAPPEFIPSSIVLKVKGGIWLRVDKL
>PPAI001801_2
MWLFLYIVFVIVSGIYFFLTWNYKHWEKRDIPYPEPKIFVGNLPGAVTQKHHVVHDIDRIYNQFKGQYFFVGIFNMRQPQYLVTDAIIARDILINKFKNFHDNEFSEMANKEKDPIFGRNPFMLRGEEWKEKRAEITPAFTQLRIKAMYPVIEDVCERMKKYILRENKEAIECREMSAKFTTDVVSSCIFGIDAGSFAGDKAPIREMGKKIMDFSPRLMLYFILVQLIPSLRKIYKITFVEKVVEKFFVSIMKDAIDLRKKNNIDRNDYLHYLLELQERKNLSELDMVAHAITFFVDGFETSSIVLSFALYQLAKHKEAQDKLRQEIKETLEKHGEINFDVVNEMPYLEQVVAETLRLNPPGTFLSRQVTQPCELQLSENKVVTMEEGTGLLIPIYSMHRDSRYFEDPESFIPERFAPEKGGVKIYRDKGCYMPFGEGPRICLGMRFAQTQLRAAIVSVVRDFEITVDAKTPEKIVLNPKEFIPTILGGTWLRFSEIK
>PPAI001803a
MELFLFLYILFVIASGIYFFLTWNYKHWEKRGVPFPEPGIFVGNVPGAVTQKHHLLYDLDKIYNQFKDKYSLVGYFNMRQPQYMVTDASVAKDVLVNKFKNFHDNEFADMTDKVRVFFLLCLVTPI
>PPAI001804_1
MLHEIFYFLIGLGVIFYVYMIWHFDYWKKRHVPAPQPRFLLGNLPGAVTQRRHLSYDVDDIYREYKAQHGFVGIINMRQPNIVIIHPDLVKQVLVRNFSSFADNSFADFTDKHADPIIGRNPFILKGDEWREKRGEITPAFTVSRIQTMYPVIDHVCKRMIKYLRHANQQGPNGFEAKELAAKYNTDVVSSCIFGLDGGSFNGGRAVIREMGKALFTPNWRLIAYIVVAQIFPFLRKIYKIAFVPKHVELFFVDIMKDAVAFRRQTNVERFDYLHYLLELQDKKNLNELDMVAHAITFFLNGFETSSIAISYTLYELAQNKQVQDKLRREIRETTDKHSELSYDVLSKMPYLDQVFNEALRIHPPFAFLCKTCTESTEFRLRVGEYRTVEKDMQVIVPIYSLHHDPEYYTDPNKFIPERFNPEHGGVKAYRDKGVLIPFGDGPRVCLGEKFAMAQVKAAIVSLVKTFEITVNPRTRTHLVSDPKQFLTYPIGGIWLDFKTISQ
>PPAI001804_4
MFQELVYILSGLGILFYVFMTWNFEYWKKRKVPGPPPRFLLGNLPSFITQKEFVAYEVDRLYKEFKNRYGFIGFLNARSPNVLIINPELVKEVLIKNFRSFSDNTFASFTDKESDPIFGRNPFMLKGTEWKEKRAEITPAFTVSRIKTMYPVVEDVCSVMKQYIQRENKKNPKGFDAKELSAKFTTDVVSNCIFGLDAGSFTKEKAIIREMGKELFTPNWRILVYFFILTVFPAVRHIYKMPFVPKNVEQFFVKIMKDAIAFRKKSNLDRFDYLHYLLELKEKKNLNELDMVAHAVTFFIDGFETSSIALSFALYEIANNKNVQEKLRNEIRDTLAKHGKITHDVVSEMPYLDQVFMESLRLYPPAAILAKLVTETTELKLSDGDYRTIEKGMEVFIPVYSLQRDPEYFDQPDSFIPERFDQENGGVKAFRDKGVFLPFGDGPRICLGQRFALAQVKAAIVSLVKDFDISVNPKTKVPLVFDPKQFLIYPLDGIWLDFKEL
>PPAI001804_3
MIQIIVCIIGGLIVAGYVYLTWHHDHWKKRRIPGPSPRFLLGNLPSVVTQKRNMTYEIDDLYREFKDRHGLIGYFSMRSPSLMVLQPDLAKDILIKNFKSFSENQFSDMIDKNVDPIFGRNPFMLNGNEWKEKRAEITPAFTTSRIKTMYPIVDDVCANMKKYLIKEIEKKPTNGFEVKELSAMYTTDVVSNCIFGVDAGSFTGGDTTIRKMGKELFTPNWKIMVYFLALELFPFIYNVYQMPFVPKRVEQFFVNLMKDAIALRREKNINRFDYLHYLLELNEKKNLNELDMVAHAVTFFIDGFETSSIALAFTLYELARHKSAQEKLRKEIRDTLSKHGTITHDVVSEMPYLDQVLNESLRLFPPAAFMGKVCTEKTEMKVKEGDYHTIDVGDEVLIPVYSFHRDPEFYENPDEFNPERFNPENGGIKNFREKGVFLPFGDGPRICLGQRFAQAQVKAALVSLIQNFEVDVNSKTQEPIVLDPKEFLAYAKGGLWLDFKEI
>PPAI001833_2
VDQLVGNSLMALTGQKWKDMRATLSPAFTGSKMRLMCDFMVESCDQMVSYLKEEVTKKGLQSYDVKELIARLAVDVIGTCAFGVKVDSLKDKNNEFFVTSRSLINFTSISLQIKFILYIICPQIMKFFKISFFSEAASNFIRNIVLDTMKTREEKNIIRPDMIHLLMEAKKGNLINAGNDKDSAGFATVEESDIGMRTFIKRSWKDDELVGQCFLFFLAGYEALSTITSFVIYEIMVNTDVQNKLYQEVSEMDKKSEGKSLNYDTLKQLKYLDMVVSEVLRKWSGPALDRVCTRDFTFKYDVDKEYTFHKNDLIWIPTASYHHNPEFFPNPEKFDPERFSDENKDSINLSAYAPFGIGPRNCIGSRFALMEMKSTIYYLVLNFHVEPTEKTQIPIKFTNSVIGLQPEKGIHAQFRPRY
>PPAI001836_2
MLELLFIVAVVLLVKFIFNQGYKNEDFFKDKSIKFIKPHFMVGNSGNLFTRKRTIPEFFIDAYTAYPKEKFVGMFEFRNPMVLVKDPKIIKHLAVKEFDHFVDHRTIIPSEAEPLFGKSLILLKSEAWRDMRATLSPAFTGSKMRLMFELISDYSKRMVDFVSKETQSKGIQTYEMKDFFSRTANDIIATCAFGIQVNSLKDKDNEFFLKGREMTSFLKLSIFIKFILFMAVPKLLQVLRIRLIPESVTGFFKKVIIDAIDYREKNHIVRPDMIHLLMEAKKGKLSHQETERFDSEGFATVEESNIGKREPKKNLQEDDIAAQCFIFFFAGFDTVSTALSFLSYELAVNMEVQERLFQEVLETSRELGDKTLNYDTIQKMKYMDMVVSELLRMWPPVPIADRICTKELTYVDGDGLTYKFNKGDVFIMPVYAFHHDPEYFPNPSKFDPERFNEENKHNIDPGTYLPFGIGPRNCIGSRFALMEVKALMYYILLNFKIEPNEKTQIPLKLTKNPTMLSEKGIWVQLTPRSTCL
>PPAI002204
RIIEDRELSLDVEEDESDFTDALLKSIIADPSVTRDTIIYMLEDFIGGHSAIGNLVMISLGYVALNPEVGVQIQAEIDRVTERKRPVTLFDKEHLPYTMAVLFETLRYSSSPIVPHVATEDVAVSQYGITKGTVVFINNYKLNTSEKYWENPKQFDPTRFLDETPEMSESGTRYRLKKNLPHFLPFSIGKRTCIGQNLVRGFGFVMLASIMQNYNISCTDPSSIKMYPACVALPPEAFPLTLTPRNPL
>PPAI004238
MNCFSFAFSAHIWKPHRKILSPSFSINVMKHLIPMFKTKIDKMIYNLKQLDEGVDVNLLDYLYMCTLDMISTSATDVDIDLQDGKNREYVDAVIAGADLVAKRIITVPYHIEWIYRFSSLYEVEKKSLRAVNGFLDRIIKLKKTMFDEVADAEEERREELAKLNNEEIETKPKIVINQLFRFWTRGQLDFKDVRDELDVMIYTGSDTSTHLSSYTLLMLAMHPEVQQKVVEELQSVFVDESVPFDYDSVKQLTYLEMVIKETLRLYPVIPYIAREVKADIKLSELILNT
>PPAI005386
MFVLLLILGFLTFIAFRINRVRNYWNSQGIPNIPSIPFVGNFWETFAFRKSGAEQFEDLYYDEKTKSEPVVGIHCFQKPSLMVKDPELIKRVLIKDFSNFSDRYTMRAKLSPVFTSGKMRHFFNLMMDVAADLEKCLARQTIQSGTNSFTTEMKEFCALFTTDVIASCAYGVEAHSLVDPNSDFRRNGRKVFDFNFRRSIELNSFFLLPEIVSLFKFKLFSKDTSDFLRSTIQHVMLEREKTGTTRNDLIDVLIALKNSKRDKEDRILFQGDVLVAQAGVFFTAGFETSSATMSFALYELAKQVSKYQEIPFMSPHLQKRLQQEIRQHAEKHDGKLTYDNINELEYLTMVIQGMYTALKS
>PPAI006576
MYIYMCETLRLYPTLPFLDRVYMPTGDELYSLEPYNKFCIPPGMPVYIPALAIHRDPKFYPDPLKFNPERFRNCDKNSLNQYLFLAFGQGPRGCIGARFGMFQVKLAIISVLKNYQVDCCEETPPAIRMAKKSLIMQSEDPINLVFRKL
>PPAI006577
MVFLEVILGVSLCLFVLAKWWQWSSRRFWMVNGVSYIPGIPFIGALKEAFLFKKSIGELILDLYNDEKTKNQPISGFYFFHKASLIIREPELIKRILVKDFNFFQDRRVATDAQSDTIGGNTMPLIKGENWKNIRSNISPIFTGVKMKNFYLLLKEVCEVFEEKLSREICIEKQYDIKELSGHLTVDMLAICAFGVNANSLNNSQSQFYEQARSISNFTWRRAINFCGCFFFPELASFLKFTMFPDSVNNFMRDSINYVMEQREQSGTKRNDLID
>PPAI006649
MQDFHKYLINKNLNFIITALAAVTAVMLSAKFTTENVASCAFSLEANSFDDPKSEFRTMGKKIFQPSFWMGIKFMIIFLLPYLAKIFSVQLLSKEVAQWARKLIRENVKSRQNRKLPNEDMVQIMLSFQDKHNLTQDQVAGHAMSFFVDGYETSSSVLAFALWQVARHRDIQDKLHENMYKTLCNAQIAGTEGAISSTAWNTNSHSNLRYTPIRIVHALFKELERSVH
>PPAI006688
PVEKGRILRQSLILLSAETVRKYPVVHLLQRQSVADYRIPGTNVTIPAGTLFYVPLWSIQNDSAFFPQPSAFDPSRFSPENILNIPARAYMPFGDGPRYCIGRKLGQVQTLLAIATLLRRYKFTPCPRTPKVIRPNPKSVFINTTGVWLKVER
>PPAI007056ap
MASFYILTFLLCIIVYVWYYVWKALSYWSDRNVPVLKAKFPLGSLGEVGKKHFGNVIGETYLKLKGKGLLAGFYMLLSPVVVPLDLDFIKDILIKDFQYFADRKIFYNEEDDPLSAHLVAIRGEKWRRFRQQLTPTFTSGKMKMMFPLVIGQAKNLQKYINKHINESPMEFKNVCIRFTADVSGISAFGLECRALLDEDSEILKIGKHFFSFNTFMKQVKFFFTIVCEDWARKLGLRFNHPELEKFFMRVIKETVRQREAGIIETSSGN*EFFEGRWCS
>PPAI007072
MNASEDRVITQAIAFYVDGYETSSTTLAFTLWHLAQYPDIQNTLYEEVATIAEKHQNTLSYETINEMVYLDMVLQETMRLNPVGLTMQRICTKPYALPKLPGQKEAVVLQPGTSVLIPVYSIH
>PPAI007482
RLTKMYHEQKRCSNITYSFIGKILQNKKRDMQNKNHRNAEREVVTKPEDDFDEKGSFKSPQIFIDQLLKLEGSHFNDWDMLSEASTIVAAGYETSALMIAYAILMLAMYPEYQQRVFEEVKNVFPNKDFEIAYDDLNKLEFTERVIKETMRLFPAVP
>PPAI007387ap
MWLLLIFLGLVVYYVYRWLTDNQYYFKERGIPYTERHYGIGAFYKIFTKQTTVQDLIWSYYSRYSDHQVVGLWEMNRPFYFIRDPKLVRTIGVKSFDHFHDKVAIITGEMDPFLGNSLVMLKGQKWRDMRATLSPAFTGSKMRLMCELVVEIGEQMVEFIQKEAKEKGPQTYEMKKFFSRIATDLIATCAFGVKVDSLHDDQNAFYLNATRLSDFTKARKLLKFFAFRAIPKVMIGLGITLNTKEDMEYLKRLVVDSMKIREEKNIYRPDMIHLLMEAQKGKLKHTQTDNDSAGFATVEEASTGWKKTTETWSETEIVAQCFLFLMAGYETVSTVVSFTAYELAINPDIQQKLYDEIRQMHKDLNGKRHNYETLQKMKYLDMVVSEILRKWPPAPFIDRTCTENFSVDLDNGQKLTFEKDNIMWIPVHAFHRDPNHYPDPEKFDPERFNDENKSKIDPNTYIPFGLGPRNCIGNSFLSHYIKF*LKLLSFPGSRFALMETKSILFHLLLNFSIEVTSKTQIPLVLAKMLSGLQGENGIHLMFRPRD
>PPAI008720a
MNELLAQLLIFAIPLIIFFLIADYQKKQNVFKGTKFCGPTPLPILGNGLILSGKSSAEIFTTCEDLVKTYGSCVRMWLGSTLNIMISDPKYVEVSNTLIDKSEDYTFLRNWLGDGLLLSTGKKWHSRRKIITPTFHFKILEQFVEIFDRQGDTFVETLKKVKPNESVNIYPLVTLYALDVIC
>PPAI008720aaaa
AERRPDVTIPAGSGITVSAYFLGRDPNLFPNPETFDPERFNVERSVETQNPYSYVPFSAGPRNCIGQKYAILEMKSIAAKIVKNFELSVHEDYKKPILMAEIVLRPENGVHLKFK
>PPAI009964
MRYWLGPKLYVLIRKPEDMQTVLNAPECLNRDDVYKYVTNLAGNGLVALPVDTWKEHRKYLNPTFSLKILQSYMPIFNKESHTLTNRLRDFIRKPAFDIYRFMDACTLDIVCRKDNHGERNEHSKESKQRVFRGRQQPYLIYKSKYNIDAFLLDFVPFNKILFSILTQNLNLMLCEKFSHDAPFLIHTELNLKTCLTCNCTAVYYFSVFHFKVMEEDEEISFKSPQLYIDQLLKLSMEGNLFNDEDVKNESNTIISTGFESTALITSYCVLMMAMHPEIQEKVFEEIRAVVTDPTNVKYEELGDLKYTERVIKETMRLFPTVPAIARVASAPFQLRQFTIPANTHFVISILTLHRDKEVWGPKADQFDPDHFLQENFEKVHPYAYVPFSAGPRNCIGIKYAYMLMKVLVVHLVSNFKFETSLRLPDLNHRVDITFKLNNKHMVSVLPRIN
>PPAI005165a
MLSVILLGIIFAIVIYESYKYMFYRPPNFPPGPPRIPIFGSYLFLLLINRRDLHLAALTLSKWYKSKVIGMYLATVPTVICHDADGVKEILNRQEFDGRADIYLARMRDPNHNLRGIFFTEGPFWKNQRRFTLRHLRDYGFGRRFTELEIEVRDEICSFLDILRNGPKYPHEHELMKNGYVLIPEIFYASSGNAFLKILSGDKLPRSEQGILFETGRRGLQFQAGGDDYGKLLSVIPWIRYFFPEESDYINLRDGNNGVYKFIKSIIDKHMESFDGNEQLILICVDFFFPALTGVPVTLALFFQRLLLQPEILTKMQTEIDEVVGRGRLPELDDRINLPYVEATVREIMRFETLVPSSIPHKALVDCKFMGYDIPEGAFVIPGLYALHNDTKVWSDPKVFRPERFIGEDGKLSLKLDKSLPFGAGKRLCAGETFARNTLFLMIAALAQNFNIRQPPSDRLPDLSKNYTGIIQLTPNYWLKFEAR
>PPAI005316
MAVKDFDHFLDHRVNLDEDQDPLFGRNLFALKGQRWRDMRSTLSPAFTGSKMRTMFQLVSECCSAMGLTLFSEKFCNFFRSLVWDTIRERERHSIVRPDMINLLIQARKGKLKHEDEETDQEGFAVVQETNVGKALDHTNIHSDPIFFFSELVEDDLTAQCFIFFLAGFDTSSTCMSFTAHELAANPEVQQKLLLEVDAIKEELGGKSLTYEALQKMLYLDMVISESLRYWPPAVATDRQCVKPYVIKTDKINCEVKVGEGIMIPIVSLHHDPQYFPNPSRFDPERFNEENKHNITPFTYLPFGVGPRNCIGSRFALMETKAIIYYILTKFTFEVSEKTQVPLKLAKTGFALKPEKGFWVNLKPR
>PPAI005316a
VFGVFEMRKPRFMIRDPELIKQITVKDFDHFLDHRFNIDERNEPLFGRNLLILKGQRWREMRSTLSPAFTGSKMRTMFQLVSECCSEVVSFLENDANGKVRQTDLKDLFSKYTNNVIASCAFGLKVDSLKDKNNEFYLYGKEATNLEGLGTLFFFMQMIFPKLSKVLRLNLFSEAFSKFFRNLVWDTIRHRERENIIRPDMINLLIQARKGKLKHEVEVNYKEGFAVVQETHVGEAIDKSKLQEDDLTAQCLIFFLAGFETSSTCMCFTAHEIAVNPEVQKKLLVEVDAMKEKLDGKPLTYEMLQDMQYLDMVVSESLRKWPPAVATDRECCKPYTIKTDTISCDVKVGEAVIIPIVSLHHDPQYFPNPSRFDPERFSEENKDKINPFMYIPFGVGPRNCIGSRFALMETKAIIYYILTKFTFEVSEKTQIPLKLAKSGLFLRAILGYFAYKWSIATFDTFEKRGIKYIPPIPLFGNF
>PPAI010200a
ISQHTSSSENQHVAALEVDTVNVKPYNEIPGPSAFELVKSSSLPGGKYYKKDFVDFLSAFRQEYGDISKIPGVFGKNDIILVYDPEDFKTVFQTQGQYPIRRGIETIHHYRTKVRKDFYQGVIGFADQGKSWWDFRQKVNAVMMKPQITRKYVPSVDEVTQDFVKRLHSLRDKNMETPSDLYVELNMWALESIAQITLDTRLGIFDNSTNKNMHSLMNDLKVFFDLTYRLNFQLSFWKYFPTASYRKLTQSTDNMYKVIQHYVNIGIQKIKDDPDNEENEGVLKKLLEIDPKVATVMAMDALFAGVDSTSTATFSVLYVLAKNPEKQDKLRQELMKILPEKTSPLTVENMSNMPYLRACIKEALRLYPVTFGNFRSTGQDLVLKGYHIPKNRWIRPPNSKMTCPVNATSHPFSYLPFGFGIRMCVGRRFAEMEIESLVSRLVRTYNIDWRYPDPKIKSLTINMPVSDLKLRLTELEE
>PPAI005186a
TDVFMNATAVHKDEHYFPDHDSFIPERWLRGEGKHENYNPFTYLPFGFGSRICVGRRFAEMEIESLVSRLVRNYHLEWHHAPPKILVHELSKQTRNSSATASNFDDEAIERSWSIAKPYGTIPGPSVLNLIRSFLPKGRFHSIPFPEVHRQLEKEYGPIYKFIGTFGKRDIVVVTDPKDFEIVYRTEGSFPLRRAMECLSYYRKEYRKEKYPVSYGLVTEQGESWWDLRHKVNGVMMKPQVTKGYTSGVDEVAREFVRKLHNMRDSNSETPANLLYFLNVWALESIAYITMNLRLGLFKEKPDENIDKLMENLKDIFQLVIELEVEPSIWKIYKTPKFNRFMQIMDYIHETIASLVDKGVENLKEQKLESGNREKGVLEKLYEIDKDIAVLMVIDSLLAGVDT
>PPAI011022a
NHISAHFRIGAIVLNRQAKIWLQPDIIFRRTKHFADHQRCLKVLHDFSYRVIRERKEMIKKEELKKLHKLSNNNNISDGTFVERDTSDSEEERMQFIASRSMKSESEEDVVGKKKRLAFLDLLIEASQDGQVLSNDDIREEVDTFM
>PPAI007033aaa
AIGQVSLDTRLGCVTGDVNTETKRIIEAINTFFWTVAEVELRMPIWRFYRTKAYKRYIEALDTFTELCMDNINRAMEKIAQDPTIKCEENISLLERIVEKTGNPKIAAILAMDLFLVGVDTTSVAVTSTIYQLSQNPEKQDILVRELEKVLPKKTSPVDIQTLENMPYLRACIKETLRMYPVTIANGRSLQSDAIISGYHIPKGTHIIFSHLAASNSDEYFPEPYRFIPERWIKRGEMDVSDCPYAGQLIHPFVSLPFGYGRRMCIGRRFAEAELQILLSKLFRKYQVEYNYGKLTYKVMPTYYPEQELKFKLTERLN
>PPAI007549aa
NVLKSFVNTFNSNSLAVVEKMREEVGKKVFDVHDYMSAVTVDILLETAMGTERTRKGNEGFNYAMAVMKMCDILHARHMRFYLRFDTIFNWSRMRLEQEK
>PPAI008720aa
LRPEPFFKISRIARREKKAIKVLHDFTDRVIIARRNELLQSGKHDDNYNRHTGDDGLGIKKKMALLDVLLQSTVDGKPLTNMDIREEVDTFMFAGHDTTTSGSCAGKHS
>PPAI001834
MFEFLLFVGLVLLVKFVIDKGFKNEHFFRDRGIKYLKPKFFVGNSANIFTRQRNPIDFFTDIYREFPDEKLIGMFEMRRPIVCIRDPELVKQLTVKDFDHFVDHRGILPIPDDVEPMFCKSLINLKGEEWRNMRATLSSAFTGSKMRLMFELVSECAKQMVAFVNNETKIKGIQSYEMKDFFSRMSTDITATCAYGIEVNSLANKDNEFYVKGKDIMNFTNPFTMFKVILYMIFPAKLLEILKVKIISVPLSGYFRTAITNTIRYREKNNIIRPDMIHLLMEANKGNLSHQETENDSAGFATVEESHIGKHKAKKILSEDDMVAQCFLFFFAGLETVASVLSFLTYELAVNPDIQEKLYQEVLEINQELGEKSLNYDTVQKMKYMDMVVSEVLRLWPPALFSDRVCNKEITLEDGKGLSYKFEKGDMILAIMVGFHHDPQYFPNPKTFDPERFSDENKHKIISGTYMPFGIGPRNCIGSRFALMEMKTILYQLILNFKIEPNEKTQIPLKLSKHPLVVSEKGIWVQFRPRKTKEN
>PPAI009828aa
MTSILVTGYKIPAGVRIMISIITVHRNKEIWGPEAEKFNPDNFLPEKVQTRHPYYYFPFGGGIRNCVGMKYSFLAVKTMIIHLLCNYRLNTELRMQDLRTKFDVTLKLVNKHMVSIEAR
>PPAI007056
MIPLYILTFLLYIIGYIWYYVRRAFSYWSDRNVSVLKPKFPLGNLGEVGKKHIGNVFGDAYLKLKGKGPFAGFYMLMSPVVMSLDLDFIKDILIKDFQYFADRKIFYNEKDDPLSAHLFAIRGEKWRRFRQQLTPTFTSGKMKMMFPLVIGQAKNLQKYIDKHINESSMQLKNVCIRFTADVIGISAFGLECRALLDEDSEILKVGKHFFSFNTFAKQVKFFFEMVCEDWARKLGLRFNHPEMEEFFMRVIKETVKQREAGIIDRNDFMKHLLEIKNSPKEDGVLSNLTFNELAAQAFIIFFAGFETSSTAMEWTLCHFALYPEIQERARQEVRDVMKKYNGDLTYEAVQELTYLRQCIDETLRIYSPAVPLFRLCVENYRVPNTDLIIEKGTQVIVPNIGIHMDPDIYPNPHLFDPDRFTSENINNRHPMAYLPFGDGPRNCIGKRFALIQVTVGLAYILNHFKFTMNSKTKLPLEIDPTDIPLRVKGGAWFNVEKLD
>PPAI007056aa
MTTWLYLLVGVLGLAWYYVKKSYSYFENQNVPVLAPTFPFGNLDPLGRKHFANVIRESYLAFKKTSDFVGFYFFTTPKFIPTNLDVIKNILIKDFNNFSDRKVYYNEEDDPLSAHLFSLRGEKWRILRQQLSPTFTSGKMKMMYPLVVAHTEPLKAFIRKNMNKGPMNFKDLCTRYTADVIGITAFGLDCKSLQQEKSEIVEISKLFFNFNTIMSRLKFFFFLSFEGLAKKMRLRFIDKEMENFFMKVIKDTVEHRETGKIDRNDFMKLLLAVKNNKDIGDNKKMTFNQMAAQAFIFFFGGFETSSLTMQYCCAHLAINQDIQERVRQEVREVLKKHNGELTYEAAHELTYLRQCIDETLRLYPPGFNLFRVATNDYKVPNSSLVIKKGTEIFIPVYGIQTDPDIYPKPHIFDPERFSAENTKNRHSMAYMPFGDGPRNCIGMRFALMELAVAISCIVNNFKLTVNPKMKVPLEFDTKEVAIYPKGGIWLDVQEIKT
>PPAI004236
VDYDSIKQLTYLEMVIKETLRLYPVIPYIGRKTTQDIKLKNLTVPAGTMIGIPIMRNNRDPVAFGPNPNLFDPDNFLPEKVAKRHPYQYMPFSCGPRNCIGMIYGLYSVRTIVAMMLMNFRVSTSLRFEDIKLVYNIALRITNENLVKLEHR
>PPAI008324a
ILGIVLCVIGFLWWWQRSARIYWEKNGVSYIPGPPLLGAVKDSILFKKSLGDLFSDLYNNEECKDDPITGVYFFHKPSLIIRHPEIIKNILVKDFPNFIDR
>PPAI008325a
MFVLEVILGIVLCVVGFLWWWQRSARIYWEKNGVSYIPGPPLIGAIKDSVLFKKSLGDVFNDLYNNEECKDDPITGVYFFHKPSLIIRHPEIIKNILVKDFPNFIDRGLNSDPHVDIIGRDNLFTVKSDRWKTIRTKLSPVFTSGKLKNLFLLMVDVSKVLEQKLAKEIGNEPKEYEMKEFASFFTTDTIAICAFGVQANSLLNPKAEFHVNSKKALDFHWKRAIEFTTCFLLPEVASKMGCTMFSRETNEFVRSTVNYVIEERIKSGVKRNDLIDTLITIKETDGDLFKGDTLVAQAAVFLIAGYETSSSAISFTLFELARHPEVQEKLRKEIKEYAEKYGTIQYETMNEMEYLQSVVQGLSFLYNLNQHFNNVSFFCNFRNSPIVSFFAVFGSNLCTSKWGTILFFGAIP
>PPAI006430
MILLKFHAVSLPKRSQIFVRSLRDFLEVKKSSRKIRNPLKVLPTLGTSDLDALHLAGFQKYQRFGKIVRETPLPGVNVVWLFDPDDIAKVLSDHGNGNYPQRRSHLALEKYRNDRPEIYRTPGLLPTNGEMWWKLRSQVQKNLSSPQTVKKFLVEIDVITRNFLEHLNPDQAMKDLLPELSRLNLEFIGFLAFDTRLNSFSVEERLPNSRSSRLIEAAEESNSCILPLDQNLPLFKLFETPLYRRFRLSQEYLEKVALEMVKNKVSSFDKKNSNDIKKSLIEEYLQNDNLEIRDIVGNMAADFFLAGIDTTTYTTSFLLYHLSNNPRVQEKLFTECLKVLPEVNSNISESALQEIPFARAVLKESLRLNPVSVGVGRLLAKDTLLSGFVVPQGTIIVTQNLISCRLPIHFHQPEYFLPERWLKTTRNSTPHSHLVLPFGHGMRILIKNRSYPWIIFQSLIFLKYKLEWKGTAKLDFQTKLVNKPSSPIQIHLIERSR
