# Supplementary material for: Genomic analysis of two phlebotomine sand fly vectors of Leishmania from the New and Old World
Source: PLoS Negl Trop Dis. 2023 Apr 12;17(4):e0010862. doi: 10.1371/journal.pntd.0010862 (PMC10138862; doi:10.1371/journal.pntd.0010862)
Supplement: S26 Table — (XLSX) [file pntd.0010862.s028.xlsx]

## Sheet: Lu. longipalpis
Table S26: Lutzomyia longipalpis Insulin SignalingGenes
Gene Name	Gene Symbol	Lu. longipalpis Vectorbase Gene ID	D. melanogaster	Ae. aegypti	An. gambiae	Revisions required	Notes
Adiponectin Receptor	AdipoR	LLOJ001737	FBgn0038984	AAEL014717	AGAP004486	Major
Chico-insulin receptor substrate 1	chico	LLOJ003065	FBgn0024248	AAEL007819, AAEL007817	AGAP008859	Minor
Coenzyme Q biosynthesis protein 2	Coq2	LLOJ007686	FBgn0037574	AAEL011249	AGAP004513	Major
Cullin	Cul1	LLOJ007109	FBgn0015509	AAEL013530	AGAP008007	Major	apparent duplication? Two full copies in scaffold
Downstream of Kinase	Dok	LLOJ006565	FBgn0029944	N/A	AGAP000825	Major
Dreadlocks-like	dock	LLOJ003901	FBgn0010583	AAEL013539	AGAP010135	None
Fibroblast growth factor receptor substrate	FGFRs	LLOJ006221	FBgn0032042	AAEL001475	AGAP009930	Minor
Forkhead box subgroup o	foxo	LLOJ008538	FBgn0038197	AAEL012847	AGAP001577	Major
Happy-hour-like MAP4K3	MAP4K3	LLOJ002088	FBgn0263395	AAEL017338, AAEL013859	AGAP010837	None
Insulin like peptide 1	Ilp1	LLOJ006186	FBgn0044051	AAEL000937, AAEL000973	AGAP010603	None
Insulin-like-Receptor	InR	LLOJ003142	FBgn0013984	AAEL002317	AGAP012424	Minor
Lnk-like signal transduction protein	Lnk	LLOJ004990	FBgn0028717	AAEL004125	AGAP003863	None
Melted-like protein	Melt	LLOJ009634	FBgn0023001	AAEL009213	AGAP007472	None
metabotropic GABA-B receptor subtype 2	GABA-B-R2	LLOJ000435	FBgn0027575	AAEL010408	AGAP004595	None
Nucleostemin ortholog1	Ns1	LLOJ004073	FBgn0038473	AAEL011255	AGAP004514	None
PDGF- and VEGF-receptor related	Pvr	LLOJ001405	FBgn0032006	AAEL003928	AGAP008813	None
Phosphatidylinositol 3-kinase catalytic subunit	Pi3K92E	LLOJ001313	FBgn0015279	AAEL002903	AGAP000018	None
Phosphoinositide-dependent kinase 1	Pdk1	LLOJ006185	FBgn0020386	AAEL006440, AAEL007284	AGAP001471	Major
Poly-like protein	poly	LLOJ005207	FBgn0086371	AAEL012624	AGAP003075	None
Protein-Tyrosine phosphatase 61F	Ptp61F	LLOJ008161	FBgn0267487	AAEL001919	AGAP005352	Minor
Pten-phosphatase	Pten	LLOJ001893	FBgn0026379	AAEL017224	AGAP009628	None
Pudgy-like AMP dependent CoA ligase	pdgy	LLOJ009886	FBgn0027601	AAEL000415	AGAP002718	None
Short neuropeptide F precursor	sNPF	LLOJ003236	FBgn0032840	AAEL012542	N/A	Minor
Similar-like Hypoxia inducible factor	sima	LLOJ000925	FBgn0266411	AAEL015383, AAEL001097	AGAP002942	None
S-phase kinase-associated protein	skpA	LLOJ001899	FBgn0025637	AAEL010651, AAEL009160	AGAP008719	None
Slmb-like F-box/WD repeat protein	slmb	LLOJ006764	FBgn0023423	AAEL003371	AGAP001944	Major
Small wing-like PLC-gamma	sl	LLOJ005588	FBgn0003416	AAEL004431	AGAP011151, AGAP011152	Major
Spargle-like peroxisome proliferator-activated receptor gamma coactivator 1	srl	LLOJ008949	FBgn0037248	AAEL003768	AGAP004361	Major
Talin	rhea	LLOJ008380	FBgn0260442	AAEL006222	AGAP007474	Major
Tango protein	tgo	LLOJ003291	FBgn0264075	AAEL010343	AGAP009748	Major
Tuberous sclerosis complex 2	Tsc2	LLOJ004899	FBgn0005198	AAEL007712	AGAP011123	Major

## Sheet: Ph. papatasi
Table S26: Phlebotomus papatasi Insulin Signaling Genes
Gene Name	Gene Symbol	Ph. papatasi Vectorbase Gene ID	D. melanogaster	Ae. aegypti	An. gambiae	Revisions required
Adiponectin Receptor	AdipoR	PPAI002915	FBgn0038984	AAEL014717	AGAP004486	None
Chico-insulin receptor substrate 1	chico	PPAI007519	FBgn0024248	AAEL007819, AAEL007817	AGAP008859	None
Cullin	Cul1	PPAI005081	FBgn0015509	AAEL013530	AGAP008007	None
Dreadlocks-like	dock	PPAI008675	FBgn0010583	AAEL013539	AGAP010135	None
Fibroblast growth factor receptor substrate	FGFRs	PPAI010918	FBgn0032042	AAEL001475	AGAP009930	Minor
Forkhead box subgroup o	foxo	PPAI000724	FBgn0038197	AAEL012847	AGAP001577	Minor
Happy-hour-like MAP4K3	MAP4K3	PPAI002155	FBgn0263395	AAEL017338, AAEL013859	AGAP010837	None
Insulin like protein 7	Ilp7	PPAI000801	FBgn0044046	AAEL003000	AGAP003927	Minor
Insulin-like-Receptor	InR	PPAI002386	FBgn0013984	AAEL002317	AGAP012424	Major
Lnk-like signal transduction protein	Lnk	PPAI004216	FBgn0028717	AAEL004125	AGAP003863	None
Melted-like protein	Melt	PPAI005856	FBgn0023001	AAEL009213	AGAP007472	None
metabotropic GABA-B receptor subtype 2	GABA-B-R2	PPAI006769	FBgn0027575	AAEL010408	AGAP004595	Major
PDGF- and VEGF-receptor related	Pvr	PPAI010744	FBgn0032006	AAEL003928	AGAP008813	Major
Phosphatidylinositol 3-kinase catalytic subunit	Pi3K92E	PPAI005862	FBgn0015279	AAEL002903	AGAP000018	None
Phosphatidylinositol 3-kinase regulatory subunit 21B	Pi3K21B	PPAI004335	FBgn0020622	AAEL013596	AGAP005583	Major
Phosphoinositide-dependent kinase 1	Pdk1	PPAI005178	FBgn0020386	AAEL006440, AAEL007284	AGAP001471	Minor
Protein-Tyrosine phosphatase 61F	Ptp61F	PPAI006334	FBgn0267487	AAEL001919	AGAP005352	None
Pten-phosphatase	Pten	PPAI003273	FBgn0026379	AAEL017224	AGAP009628	None
Pudgy-like AMP dependent CoA ligase	pdgy	PPAI001635	FBgn0027601	AAEL000415	AGAP002718	Minor
Ribosomal protein L8	RpL8	PPAI008202	FBgn0261602	AAEL000987	AGAP005802	Minor
Similar-like Hypoxia inducible factor	sima	PPAI002345	FBgn0266411	AAEL015383,AAEL001097	AGAP002942	Major
S-phase kinase-associated protein	skpA	PPAI010409	FBgn0025637	AAEL010651, AAEL009160	AGAP008719	None
Slmb-like F-box/WD repeat protein	slmb	PPAI004879	FBgn0023423	AAEL003371	AGAP001944	Major
Small wing-like PLC-gamma	sl	PPAI004351	FBgn0003416	AAEL004431	AGAP011151, AGAP011152	None
Spargle-like peroxisome proliferator-activated receptor gamma coactivator 1	srl	PPAI001168	FBgn0037248	AAEL003768	AGAP004361	Major
Sugarbabe-like zinc finger protein	sug	PPAI005712	FBgn0033782	AAEL005120	AGAP006736	Major
Talin	rhea	PPAI009170	FBgn0260442	AAEL006222	AGAP007474	Major
Tango	tgo	PPAI009623	FBgn0264075	AAEL010343	AGAP009748	None
Tuberous sclerosis complex 1	Tsc1	PPAI007877	FBgn0026317	AAEL002548	AGAP003445	Minor
Tuberous sclerosis complex 2	Tsc2	PPAI010500	FBgn0005198	AAEL007712	AGAP011123	Major
